# Supplementary material
Source: PubMed Central journal article supplement (PMC10807629)
Supplement: NIHMS1939073-supplement-1.pdf [file NIHMS1939073-supplement-1.pdf]

**Supplemental Table 1: Life Satisfaction Adjusted Model Results**

| <b>SWLS (Life Satisfaction)</b>              |                 |           |                |                |           |
|----------------------------------------------|-----------------|-----------|----------------|----------------|-----------|
| <b>Covariates</b>                            | <b>Estimate</b> | <b>SE</b> | <b>95% CI</b>  | <b>p-value</b> | <b>ES</b> |
| <b>Chronic Pain Group</b>                    |                 |           |                |                |           |
| Current vs Past Pain                         | -1.53           | 0.39      | (-2.29, -0.77) | <0.001         | 0.22      |
| Current vs No Pain                           | -2.60           | 0.28      | (-3.15, -2.04) | <0.001         | 0.37      |
| Past vs No Pain                              | -1.07           | 0.39      | (-1.83, -0.30) | 0.006          | 0.15      |
| <b>Follow-Up Period</b>                      |                 |           |                |                |           |
| Year 1 vs Year 2                             | -0.03           | 0.45      | (-0.91, 0.86)  | 0.955          | 0.004     |
| Year 1 vs Year 5                             | -1.41           | 0.40      | (-2.20, -0.61) | <0.001         | 0.20      |
| Year 1 vs Year 10                            | -1.26           | 0.43      | (-2.10, -0.42) | 0.003          | 0.18      |
| Year 1 vs Year 15+                           | -0.87           | 0.41      | (-1.67, -0.07) | 0.033          | 0.12      |
| Year 2 vs Year 5                             | -1.38           | 0.43      | (-2.23, -0.53) | 0.002          | 0.19      |
| Year 2 vs Year 10                            | -1.23           | 0.46      | (-2.13, -0.34) | 0.007          | 0.17      |
| Year 2 vs Year 15+                           | -0.85           | 0.44      | (-1.70, 0.01)  | 0.052          | 0.12      |
| Year 5 vs Year 10                            | 0.15            | 0.40      | (-0.63, 0.93)  | 0.710          | 0.02      |
| Year 5 vs Year 15+                           | 0.53            | 0.37      | (-0.19, 1.26)  | 0.151          | 0.07      |
| Year 10 vs Year 15+                          | 0.39            | 0.38      | (-0.36, 1.13)  | 0.310          | 0.05      |
| <b>Age (Years)</b>                           | 0.003           | 0.01      | (-0.02, 0.02)  | 0.777          | 0.001     |
| <b>Sex (Male vs Female)</b>                  | -0.67           | 0.29      | (-1.24, -0.09) | 0.023          | 0.09      |
| <b>White Race (Yes vs No)</b>                | -0.32           | 0.52      | (-1.34, -0.70) | 0.534          | 0.05      |
| <b>Black Race (Yes vs No)</b>                | -1.52           | 0.56      | (-2.62, -0.42) | 0.007          | 0.21      |
| <b>Other Race (Yes vs No)</b>                | -0.41           | 0.55      | (-1.48, 0.67)  | 0.459          | 0.06      |
| <b>Ethnicity (Yes vs No)</b>                 | 0.36            | 0.44      | (-0.49, 1.22)  | 0.408          | 0.05      |
| <b>Marital Status</b>                        |                 |           |                |                |           |
| Single/Other vs Married                      | -2.75           | 0.33      | (-3.40, -2.09) | <0.001         | 0.39      |
| Single/Other vs Sep/Div/Wid                  | 0.94            | 0.36      | (0.22, 1.65)   | 0.010          | 0.13      |
| Married vs Sep/Div/Wid                       | 3.68            | 0.33      | (3.04, 4.33)   | <0.001         | 0.52      |
| <b>Level of Education</b>                    |                 |           |                |                |           |
| Less than HS vs HS/Other                     | -0.68           | 0.44      | (-1.54, 0.17)  | 0.118          | 0.10      |
| Less than HS vs Some College/Associate       | -0.82           | 0.41      | (-1.63, 0.01)  | 0.049          | 0.12      |
| Less than HS vs Bachelor or Higher           | -1.88           | 0.44      | (-2.75, -1.01) | <0.001         | 0.27      |
| HS/Other vs Some College/Associate           | -0.13           | 0.34      | (-0.80, 0.54)  | 0.694          | 0.02      |
| HS/Other vs Bachelor or Higher               | -1.20           | 0.37      | (-1.91, -0.48) | 0.001          | 0.17      |
| Some College/Associate vs Bachelor or Higher | -1.06           | 0.33      | (-1.70, -0.42) | 0.001          | 0.15      |

| <b>Employment Status</b>       |       |      |                |        |       |
|--------------------------------|-------|------|----------------|--------|-------|
| Employed/Student vs Retired    | 1.58  | 0.35 | (0.90, 2.26)   | <0.001 | 0.22  |
| Employed/Student vs Unemployed | 2.52  | 0.42 | (1.70, 3.33)   | <0.001 | 0.36  |
| Employed/Student vs Other      | 1.65  | 0.60 | (0.47, 2.83)   | 0.006  | 0.23  |
| Retired vs Unemployed          | 0.93  | 0.44 | (0.07, 1.79)   | 0.034  | 0.13  |
| Retired vs Other               | 0.07  | 0.62 | (-1.14, 1.29)  | 0.908  | 0.01  |
| Unemployed vs Other            | -0.86 | 0.67 | (-2.18, 0.45)  | 0.199  | 0.12  |
| <b>Cause of Injury</b>         |       |      |                |        |       |
| Vehicular vs Fall              | -0.35 | 0.34 | (-1.02, 0.31)  | 0.298  | 0.05  |
| Vehicular vs Violence          | -0.02 | 0.40 | (-0.81, 0.78)  | 0.967  | 0.003 |
| Vehicular vs Sports/Other      | -0.97 | 0.41 | (-1.76, -0.17) | 0.017  | 0.14  |
| Fall vs Violence               | 0.34  | 0.47 | (-0.58, 1.26)  | 0.474  | 0.05  |
| Fall vs Sports/Other           | -0.62 | 0.46 | (-1.52, 0.29)  | 0.181  | 0.09  |
| Violence vs Sports/Other       | -0.95 | 0.52 | (-1.97, 0.06)  | 0.066  | 0.13  |
| <b>FIM Motor</b>               | 0.09  | 0.02 | (0.05, 0.12)   | <0.001 | 0.01  |
| <b>FIM Cognition</b>           | 0.44  | 0.04 | (0.36, 0.53)   | <0.001 | 0.06  |

SWLS = Satisfaction with Life Scale; SE = Standard Error; CI = Confidence Interval; Sep/Div/Wid = Separated / Divorced / Widowed; HS = High School; Estimates represent adjusted mean differences in outcome between groups for categorical covariates and adjusted slopes for categorical covariates; Root Mean Square Error (RMSE) = 7.09, ES = Effect Size (Estimate difference/RMSE) with ES  $\geq$  0.6 shaded in grey.

**Supplemental Table 2: PTSD Symptoms Adjusted Model Results**

| <b>PCL-5 (PTSD Symptoms)</b>                 |                 |           |                |                |           |
|----------------------------------------------|-----------------|-----------|----------------|----------------|-----------|
| <b>Covariates</b>                            | <b>Estimate</b> | <b>SE</b> | <b>95% CI</b>  | <b>p-value</b> | <b>ES</b> |
| <b>Chronic Pain Group</b>                    |                 |           |                |                |           |
| Current vs Past Pain                         | 7.37            | 0.71      | (5.98, 8.77)   | <0.001         | 0.54      |
| Current vs No Pain                           | 10.55           | 0.52      | (9.54, 11.56)  | <0.001         | 0.78      |
| Past vs No Pain                              | 3.18            | 0.71      | (1.78, 4.57)   | <0.001         | 0.23      |
| <b>Follow-Up Period</b>                      |                 |           |                |                |           |
| Year 1 vs Year 2                             | 0.03            | 0.85      | (-1.62, 1.69)  | 0.969          | 0.002     |
| Year 1 vs Year 5                             | 0.58            | 0.74      | (-0.87, 2.03)  | 0.437          | 0.04      |
| Year 1 vs Year 10                            | 1.46            | 0.78      | (-0.07, 2.99)  | 0.062          | 0.11      |
| Year 1 vs Year 15+                           | 3.04            | 0.74      | (1.58, 4.49)   | <0.001         | 0.22      |
| Year 2 vs Year 5                             | 0.54            | 0.82      | (-1.06, 2.14)  | 0.507          | 0.04      |
| Year 2 vs Year 10                            | 1.42            | 0.85      | (-0.24, 3.09)  | 0.094          | 0.10      |
| Year 2 vs Year 15+                           | 3.00            | 0.81      | (1.41, 4.60)   | <0.001         | 0.22      |
| Year 5 vs Year 10                            | 0.88            | 0.73      | (-0.55, 2.31)  | 0.226          | 0.06      |
| Year 5 vs Year 15+                           | 2.46            | 0.68      | (1.14, 3.79)   | <0.001         | 0.18      |
| Year 10 vs Year 15+                          | 1.58            | 0.69      | (0.23, 2.93)   | 0.022          | 0.12      |
| <b>Age (Years)</b>                           | -0.14           | 0.02      | (-0.18, -0.10) | <0.001         | 0.01      |
| <b>Sex (Male vs Female)</b>                  | -1.52           | 0.53      | (-2.57, -0.48) | 0.004          | 0.11      |
| <b>White Race (Yes vs No)</b>                | 0.07            | 0.95      | (-1.80, 1.94)  | 0.942          | 0.01      |
| <b>Black Race (Yes vs No)</b>                | 1.80            | 1.03      | (-0.22, 3.82)  | 0.080          | 0.13      |
| <b>Other Race (Yes vs No)</b>                | 1.29            | 1.02      | (-0.72, 3.30)  | 0.207          | 0.09      |
| <b>Ethnicity (Yes vs No)</b>                 | 1.34            | 0.80      | (-0.22, 2.90)  | 0.093          | 0.10      |
| <b>Marital Status</b>                        |                 |           |                |                |           |
| Single/Other vs Married                      | 1.34            | 0.61      | (0.15, 2.53)   | 0.028          | 0.10      |
| Single/Other vs Sep/Div/Wid                  | -0.99           | 0.67      | (-2.30, 0.31)  | 0.136          | 0.07      |
| Married vs Sep/Div/Wid                       | -2.33           | 0.61      | (-3.52, -1.15) | <0.001         | 0.17      |
| <b>Level of Education</b>                    |                 |           |                |                |           |
| Less than HS vs HS/Other                     | 1.44            | 0.79      | (-0.10, 2.99)  | 0.068          | 0.11      |
| Less than HS vs Some College/Associate       | 0.31            | 0.75      | (-1.16, 1.77)  | 0.683          | 0.02      |
| Less than HS vs Bachelor or Higher           | 0.10            | 0.81      | (-1.48, 1.68)  | 0.900          | 0.01      |
| HS/Other vs Some College/Associate           | -1.14           | 0.62      | (-2.36, 0.09)  | 0.069          | 0.08      |
| HS/Other vs Bachelor or Higher               | -1.34           | 0.67      | (-2.65, -0.02) | 0.046          | 0.10      |
| Some College/Associate vs Bachelor or Higher | -0.20           | 0.60      | (-1.38, 0.97)  | 0.735          | 0.01      |

| <b>Employment Status</b>       |        |      |                |        |        |
|--------------------------------|--------|------|----------------|--------|--------|
| Employed/Student vs Retired    | 0.45   | 0.64 | (-0.80, 1.70)  | 0.479  | 0.03   |
| Employed/Student vs Unemployed | -1.65  | 0.76 | (-3.15, -0.16) | 0.030  | 0.12   |
| Employed/Student vs Other      | 1.31   | 1.10 | (-0.85, 3.47)  | 0.233  | 0.10   |
| Retired vs Unemployed          | -2.10  | 0.81 | (-3.69, -0.52) | 0.009  | 0.15   |
| Retired vs Other               | 0.86   | 1.14 | (-1.37, 3.09)  | 0.447  | 0.06   |
| Unemployed vs Other            | 2.97   | 1.23 | (0.56, 5.38)   | 0.016  | 0.22   |
| <b>Cause of Injury</b>         |        |      |                |        |        |
| Vehicular vs Fall              | -0.70  | 0.63 | (-1.92, 0.53)  | 0.266  | 0.05   |
| Vehicular vs Violence          | -2.95  | 0.75 | (-4.43, -1.47) | <0.001 | 0.22   |
| Vehicular vs Sports/Other      | -0.66  | 0.75 | (-2.12, 0.81)  | 0.380  | 0.05   |
| Fall vs Violence               | -2.25  | 0.88 | (-3.97, -0.54) | 0.010  | 0.17   |
| Fall vs Sports/Other           | 0.04   | 0.85 | (-1.62, 1.71)  | 0.962  | 0.003  |
| Violence vs Sports/Other       | 2.29   | 0.96 | (0.41, 4.17)   | 0.017  | 0.17   |
| <b>FIM Motor</b>               | -0.002 | 0.03 | (-0.06, 0.06)  | 0.948  | 0.0001 |
| <b>FIM Cognition</b>           | -1.65  | 0.08 | (-1.81, -1.50) | <0.001 | -0.12  |

PCL-5 = Posttraumatic Stress Disorder Checklist for DSM-5 ; SE = Standard Error; CI = Confidence Interval; Sep/Div/Wid = Separated / Divorced / Widowed; HS = High School; Estimates represent adjusted mean differences in outcome between groups for categorical covariates and adjusted slopes for categorical covariates; Root Mean Square Error (RMSE) = 13.61, ES = Effect Size (Estimate difference/RMSE) with ES  $\geq$  0.6 shaded in grey.

**Supplemental Table 3: Depression Symptoms Adjusted Model Results**

| <b>PHQ-9 (Depression Symptoms)</b>           |                 |           |                |                |           |
|----------------------------------------------|-----------------|-----------|----------------|----------------|-----------|
| <b>Covariates</b>                            | <b>Estimate</b> | <b>SE</b> | <b>95% CI</b>  | <b>p-value</b> | <b>ES</b> |
| <b>Chronic Pain Group</b>                    |                 |           |                |                |           |
| Current vs Past Pain                         | 2.51            | 0.26      | (2.00, 3.01)   | <0.001         | 0.52      |
| Current vs No Pain                           | 3.44            | 0.19      | (3.08, 3.80)   | <0.001         | 0.71      |
| Past vs No Pain                              | 0.93            | 0.26      | (0.42, 1.44)   | <0.001         | 0.19      |
| <b>Follow-Up Period</b>                      |                 |           |                |                |           |
| Year 1 vs Year 2                             | -0.36           | 0.30      | (-0.95, 0.23)  | 0.237          | 0.07      |
| Year 1 vs Year 5                             | 0.35            | 0.27      | (-0.17, 0.88)  | 0.184          | 0.07      |
| Year 1 vs Year 10                            | 0.25            | 0.28      | (-0.31, 0.80)  | 0.382          | 0.05      |
| Year 1 vs Year 15+                           | 1.05            | 0.27      | (0.52, 1.57)   | <0.001         | 0.22      |
| Year 2 vs Year 5                             | 0.71            | 0.29      | (0.14, 1.28)   | 0.015          | 0.15      |
| Year 2 vs Year 10                            | 0.60            | 0.30      | (0.01, 1.20)   | 0.047          | 0.12      |
| Year 2 vs Year 15+                           | 1.40            | 0.29      | (0.84, 1.97)   | <0.001         | 0.29      |
| Year 5 vs Year 10                            | -0.11           | 0.26      | (-0.62, 0.41)  | 0.688          | 0.02      |
| Year 5 vs Year 15+                           | 0.69            | 0.24      | (0.21, 1.17)   | 0.005          | 0.14      |
| Year 10 vs Year 15+                          | 0.80            | 0.25      | (0.31, 1.29)   | 0.001          | 0.17      |
| <b>Age (Years)</b>                           | -0.03           | 0.01      | (-0.04, -0.02) | <0.001         | 0.01      |
| <b>Sex (Male vs Female)</b>                  | -0.30           | 0.19      | (-0.67, 0.08)  | 0.126          | 0.06      |
| <b>White Race (Yes vs No)</b>                | 0.25            | 0.34      | (-0.42, 0.93)  | 0.459          | 0.05      |
| <b>Black Race (Yes vs No)</b>                | 0.41            | 0.37      | (-0.33, 1.13)  | 0.279          | 0.08      |
| <b>Other Race (Yes vs No)</b>                | -0.10           | 0.36      | (-0.82, 0.61)  | 0.775          | 0.02      |
| <b>Ethnicity (Yes vs No)</b>                 | 0.45            | 0.29      | (-0.11, 1.01)  | 0.119          | 0.09      |
| <b>Marital Status</b>                        |                 |           |                |                |           |
| Single/Other vs Married                      | 0.11            | 0.22      | (-0.32, 0.54)  | 0.611          | 0.02      |
| Single/Other vs Sep/Div/Wid                  | -0.63           | 0.24      | (-1.10, -0.16) | 0.008          | 0.13      |
| Married vs Sep/Div/Wid                       | -0.75           | 0.22      | (-1.17, -0.32) | <0.001         | 0.16      |
| <b>Level of Education</b>                    |                 |           |                |                |           |
| Less than HS vs HS/Other                     | 0.14            | 0.28      | (-0.42, 0.70)  | 0.622          | 0.03      |
| Less than HS vs Some College/Associate       | -0.26           | 0.27      | (-0.79, 0.26)  | 0.326          | 0.05      |
| Less than HS vs Bachelor or Higher           | -0.03           | 0.29      | (-0.60, 0.54)  | 0.908          | 0.01      |
| HS/Other vs Some College/Associate           | -0.40           | 0.23      | (-0.85, 0.04)  | 0.073          | 0.08      |
| HS/Other vs Bachelor or Higher               | -0.17           | 0.24      | (-0.65, 0.30)  | 0.474          | 0.04      |
| Some College/Associate vs Bachelor or Higher | 0.23            | 0.22      | (-0.19, 0.66)  | 0.288          | 0.05      |

| <b>Employment Status</b>       |       |      |                |        |       |
|--------------------------------|-------|------|----------------|--------|-------|
| Employed/Student vs Retired    | 0.07  | 0.23 | (-0.38, 0.52)  | 0.760  | 0.01  |
| Employed/Student vs Unemployed | -0.54 | 0.27 | (-1.08, -0.01) | 0.047  | 0.11  |
| Employed/Student vs Other      | 0.23  | 0.39 | (-0.54, 1.01)  | 0.554  | 0.05  |
| Retired vs Unemployed          | -0.61 | 0.29 | (-1.17, -0.05) | 0.033  | 0.13  |
| Retired vs Other               | 0.16  | 0.41 | (-0.63, 0.96)  | 0.687  | 0.03  |
| Unemployed vs Other            | 0.77  | 0.44 | (-0.09, 1.63)  | 0.078  | 0.16  |
| <b>Cause of Injury</b>         |       |      |                |        |       |
| Vehicular vs Fall              | 0.02  | 0.22 | (-0.42, 0.46)  | 0.944  | 0.004 |
| Vehicular vs Violence          | -0.38 | 0.27 | (-0.91, 0.14)  | 0.155  | 0.08  |
| Vehicular vs Sports/Other      | 0.27  | 0.27 | (-0.26, 0.79)  | 0.322  | 0.06  |
| Fall vs Violence               | -0.40 | 0.31 | (-1.01, 0.21)  | 0.202  | 0.08  |
| Fall vs Sports/Other           | 0.25  | 0.30 | (-0.35, 0.85)  | 0.412  | 0.05  |
| Violence vs Sports/Other       | 0.65  | 0.34 | (-0.02, 1.32)  | 0.059  | 0.13  |
| <b>FIM Motor</b>               |       |      |                |        |       |
|                                | 0.03  | 0.01 | (-0.06, -0.01) | 0.003  | 0.01  |
| <b>FIM Cognition</b>           |       |      |                |        |       |
|                                | -0.59 | 0.03 | (-0.65, -0.54) | <0.001 | 0.12  |

PHQ-9 = Patient Health Questionnaire; SE = Standard Error; CI = Confidence Interval; Sep/Div/Wid = Separated / Divorced / Widowed; HS = High School; Estimates represent adjusted mean differences in outcome between groups for categorical covariates and adjusted slopes for categorical covariates; Root Mean Square Error (RMSE) = 4.83; ES = Effect Size (Estimate difference/RMSE) with ES  $\geq$  0.6 shaded in grey.

**Supplemental Table 4: Anxiety Symptoms Adjusted Model Results**

| <b>GAD-7 (Anxiety Symptoms)</b>              |                 |           |                |                |           |
|----------------------------------------------|-----------------|-----------|----------------|----------------|-----------|
| <b>Covariates</b>                            | <b>Estimate</b> | <b>SE</b> | <b>95% CI</b>  | <b>p-value</b> | <b>ES</b> |
| <b>Chronic Pain Group</b>                    |                 |           |                |                |           |
| Current vs Past Pain                         | 2.50            | 0.25      | (2.02, 2.99)   | <0.001         | 0.55      |
| Current vs No Pain                           | 2.95            | 0.18      | (2.60, 3.29)   | <0.001         | 0.65      |
| Past vs No Pain                              | 0.45            | 0.25      | (-0.04, 0.93)  | 0.071          | 0.10      |
| <b>Follow-Up Period</b>                      |                 |           |                |                |           |
| Year 1 vs Year 2                             | 0.19            | 0.28      | (-0.37, 0.75)  | 0.508          | 0.04      |
| Year 1 vs Year 5                             | -0.01           | 0.25      | (-0.51, 0.48)  | 0.961          | 0.002     |
| Year 1 vs Year 10                            | 0.42            | 0.27      | (-0.10, 0.95)  | 0.114          | 0.09      |
| Year 1 vs Year 15+                           | 0.86            | 0.25      | (0.37, 1.36)   | <0.001         | 0.19      |
| Year 2 vs Year 5                             | -0.20           | 0.27      | (-0.74, 0.34)  | 0.465          | 0.04      |
| Year 2 vs Year 10                            | 0.23            | 0.29      | (-0.33, 0.80)  | 0.415          | 0.05      |
| Year 2 vs Year 15+                           | 0.67            | 0.27      | (0.14, 1.21)   | 0.014          | 0.15      |
| Year 5 vs Year 10                            | 0.43            | 0.25      | (-0.05, 0.92)  | 0.082          | 0.09      |
| Year 5 vs Year 15+                           | 0.88            | 0.23      | (0.42, 1.33)   | <0.001         | 0.19      |
| Year 10 vs Year 15+                          | 0.44            | 0.24      | (-0.02, 0.90)  | 0.061          | 0.10      |
| <b>Age (Years)</b>                           | -0.04           | 0.01      | (-0.06, -0.03) | <0.001         | 0.01      |
| <b>Sex (Male vs Female)</b>                  | -0.69           | 0.18      | (-1.05, 0.34)  | <0.001         | 0.15      |
| <b>White Race (Yes vs No)</b>                | 0.15            | 0.32      | (-0.49, 0.79)  | 0.646          | 0.03      |
| <b>Black Race (Yes vs No)</b>                | 0.80            | 0.35      | (0.11, 1.49)   | 0.022          | 0.18      |
| <b>Other Race (Yes vs No)</b>                | -0.44           | 0.35      | (-1.12, 0.24)  | 0.202          | 0.10      |
| <b>Ethnicity (Yes vs No)</b>                 | 0.54            | 0.27      | (0.01, 1.07)   | 0.047          | 0.12      |
| <b>Marital Status</b>                        |                 |           |                |                |           |
| Single/Other vs Married                      | 0.05            | 0.21      | (-0.36, 0.45)  | 0.827          | 0.01      |
| Single/Other vs Sep/Div/Wid                  | -0.70           | 0.23      | (-1.14, -0.25) | 0.002          | 0.15      |
| Married vs Sep/Div/Wid                       | -0.74           | 0.21      | (-1.15, -0.34) | <0.001         | 0.16      |
| <b>Level of Education</b>                    |                 |           |                |                |           |
| Less than HS vs HS/Other                     | 0.12            | 0.27      | (-0.40, 0.65)  | 0.650          | 0.03      |
| Less than HS vs Some College/Associate       | 0.03            | 0.25      | (-0.47, 0.53)  | 0.907          | 0.01      |
| Less than HS vs Bachelor or Higher           | -0.04           | 0.28      | (-0.58, 0.50)  | 0.874          | 0.01      |
| HS/Other vs Some College/Associate           | -0.09           | 0.21      | (-0.51, 0.32)  | 0.666          | 0.02      |
| HS/Other vs Bachelor or Higher               | -0.17           | 0.23      | (-0.61, 0.28)  | 0.470          | 0.04      |
| Some College/Associate vs Bachelor or Higher | -0.07           | 0.20      | (-0.47, 0.33)  | 0.720          | 0.02      |

|                                |       |      |                |        |       |
|--------------------------------|-------|------|----------------|--------|-------|
| <b>Employment Status</b>       |       |      |                |        |       |
| Employed/Student vs Retired    | 0.45  | 0.22 | (0.03, 0.88)   | 0.035  | 0.10  |
| Employed/Student vs Unemployed | -0.02 | 0.26 | (-0.53, 0.48)  | 0.927  | 0.004 |
| Employed/Student vs Other      | 0.26  | 0.37 | (-0.46, 0.99)  | 0.478  | 0.06  |
| Retired vs Unemployed          | -0.48 | 0.27 | (-1.01, 0.06)  | 0.079  | 0.11  |
| Retired vs Other               | -0.19 | 0.38 | (-0.94, 0.56)  | 0.616  | 0.04  |
| Unemployed vs Other            | 0.29  | 0.41 | (-0.52, 1.10)  | 0.488  | 0.06  |
| <b>Cause of Injury</b>         |       |      |                |        |       |
| Vehicular vs Fall              | -0.25 | 0.21 | (-0.67, 0.16)  | 0.232  | 0.05  |
| Vehicular vs Violence          | -0.62 | 0.25 | (-1.12, -0.12) | 0.015  | 0.14  |
| Vehicular vs Sports/Other      | -0.01 | 0.26 | (-0.51, 0.50)  | 0.983  | 0.002 |
| Fall vs Violence               | -0.36 | 0.29 | (-0.94, 0.21)  | 0.217  | 0.08  |
| Fall vs Sports/Other           | 0.25  | 0.29 | (-0.32, 0.82)  | 0.391  | 0.05  |
| Violence vs Sports/Other       | 0.61  | 0.33 | (-0.03, 1.25)  | 0.060  | 0.13  |
| <b>FIM Motor</b>               | -0.02 | 0.01 | (-0.04, 0.01)  | 0.173  | 0.004 |
| <b>FIM Cognition</b>           | -0.50 | 0.03 | (-0.55, -0.44) | <0.001 | 0.11  |

GAD-7 = General Anxiety Disorder Questionnaire; SE = Standard Error; CI = Confidence Interval; Sep/Div/Wid = Separated / Divorced / Widowed; HS = High School; Estimates represent adjusted mean differences in outcome between groups for categorical covariates and adjusted slopes for categorical covariates; Root Mean Square Error (RMSE) = 4.56, ES = Effect Size (Estimate difference/RMSE) with ES  $\geq$  0.6 shaded in grey.



**Supplemental Table 5: Sleep Adjusted Model Results**

| <b>PSQI (Sleep)</b>                          |                 |           |                |                |           |
|----------------------------------------------|-----------------|-----------|----------------|----------------|-----------|
| <b>Covariates</b>                            | <b>Estimate</b> | <b>SE</b> | <b>95% CI</b>  | <b>p-value</b> | <b>ES</b> |
| <b>Chronic Pain Group</b>                    |                 |           |                |                |           |
| Current vs Past Pain                         | 2.37            | 0.21      | (1.96, 2.78)   | <0.001         | 0.60      |
| Current vs No Pain                           | 3.22            | 0.15      | (2.93, 3.52)   | <0.001         | 0.81      |
| Past vs No Pain                              | 0.85            | 0.21      | (0.44, 1.26)   | <0.001         | 0.21      |
| <b>Follow-Up Period</b>                      |                 |           |                |                |           |
| Year 1 vs Year 2                             | -0.23           | 0.25      | (-0.72, 0.26)  | 0.357          | 0.06      |
| Year 1 vs Year 5                             | -0.22           | 0.22      | (-0.64, 0.21)  | 0.312          | 0.06      |
| Year 1 vs Year 10                            | -0.18           | 0.23      | (-0.63, 0.27)  | 0.426          | 0.05      |
| Year 1 vs Year 15+                           | -0.13           | 0.22      | (-0.56, 0.29)  | 0.537          | 0.03      |
| Year 2 vs Year 5                             | 0.01            | 0.24      | (-0.46, 0.48)  | 0.967          | 0.003     |
| Year 2 vs Year 10                            | 0.05            | 0.25      | (-0.44, 0.54)  | 0.851          | 0.01      |
| Year 2 vs Year 15+                           | 0.09            | 0.24      | (-0.37, 0.56)  | 0.692          | 0.02      |
| Year 5 vs Year 10                            | 0.04            | 0.21      | (-0.38, 0.45)  | 0.861          | 0.01      |
| Year 5 vs Year 15+                           | 0.08            | 0.20      | (-0.30, 0.47)  | 0.668          | 0.02      |
| Year 10 vs Year 15+                          | 0.05            | 0.20      | (-0.35, 0.44)  | 0.813          | 0.01      |
| <b>Age (Years)</b>                           | -0.01           | 0.01      | (-0.03, -0.00) | 0.013          | 0.003     |
| <b>Sex (Male vs Female)</b>                  | -0.23           | 0.16      | (-0.54, 0.08)  | 0.141          | 0.06      |
| <b>White Race (Yes vs No)</b>                | 0.54            | 0.28      | (-0.01, 1.09)  | 0.053          | 0.14      |
| <b>Black Race (Yes vs No)</b>                | 0.71            | 0.30      | (0.12, 1.31)   | 0.019          | 0.18      |
| <b>Other Race (Yes vs No)</b>                | 0.60            | 0.30      | (0.01, 1.19)   | 0.045          | 0.15      |
| <b>Ethnicity (Yes vs No)</b>                 | 0.26            | 0.23      | (-0.20, 0.72)  | 0.266          | 0.07      |
| <b>Marital Status</b>                        |                 |           |                |                |           |
| Single/Other vs Married                      | 0.13            | 0.18      | (-0.22, 0.48)  | 0.456          | 0.03      |
| Single/Other vs Sep/Div/Wid                  | -0.25           | 0.19      | (-0.63, 0.13)  | 0.199          | 0.06      |
| Married vs Sep/Div/Wid                       | -0.38           | 0.18      | (-0.73, -0.03) | 0.031          | 0.10      |
| <b>Level of Education</b>                    |                 |           |                |                |           |
| Less than HS vs HS/Other                     | 0.06            | 0.23      | (-0.40, 0.51)  | 0.808          | 0.02      |
| Less than HS vs Some College/Associate       | -0.19           | 0.22      | (-0.62, 0.24)  | 0.394          | 0.05      |
| Less than HS vs Bachelor or Higher           | -0.33           | 0.24      | (-0.79, 0.13)  | 0.160          | 0.08      |
| HS/Other vs Some College/Associate           | -0.24           | 0.18      | (-0.60, 0.12)  | 0.184          | 0.06      |
| HS/Other vs Bachelor or Higher               | -0.39           | 0.20      | (-0.77, 0.01)  | 0.048          | 0.10      |
| Some College/Associate vs Bachelor or Higher | -0.14           | 0.18      | (-0.49, 0.20)  | 0.411          | 0.04      |

| <b>Employment Status</b>       |       |      |                |        |       |
|--------------------------------|-------|------|----------------|--------|-------|
| Employed/Student vs Retired    | -0.01 | 0.19 | (-0.37, 0.35)  | 0.955  | 0.003 |
| Employed/Student vs Unemployed | -0.50 | 0.22 | (-0.94, -0.06) | 0.025  | 0.13  |
| Employed/Student vs Other      | 0.50  | 0.32 | (-0.14, 1.13)  | 0.127  | 0.13  |
| Retired vs Unemployed          | -0.49 | 0.24 | (-0.96, -0.03) | 0.039  | 0.12  |
| Retired vs Other               | 0.51  | 0.33 | (-0.15, 1.16)  | 0.131  | 0.13  |
| Unemployed vs Other            | 1.00  | 0.36 | (0.29, 1.71)   | 0.006  | 0.25  |
| <b>Cause of Injury</b>         |       |      |                |        |       |
| Vehicular vs Fall              | -0.15 | 0.18 | (-0.51, 0.21)  | 0.413  | 0.04  |
| Vehicular vs Violence          | -1.03 | 0.22 | (-1.46, -0.59) | <0.001 | 0.26  |
| Vehicular vs Sports/Other      | 0.12  | 0.22 | (-0.31, 0.55)  | 0.571  | 0.03  |
| Fall vs Violence               | -0.88 | 0.26 | (-1.38, -0.37) | <.001  | 0.22  |
| Fall vs Sports/Other           | 0.27  | 0.25 | (-0.21, 0.76)  | 0.271  | 0.07  |
| Violence vs Sports/Other       | 1.15  | 0.28 | (0.60, 1.70)   | <0.001 | 0.29  |
| <b>FIM Motor</b>               |       |      |                |        |       |
|                                | -0.03 | 0.01 | (-0.05, -0.01) | <0.001 | 0.01  |
| <b>FIM Cognition</b>           |       |      |                |        |       |
|                                | -0.27 | 0.02 | (-0.31, -0.22) | <0.001 | 0.07  |

PSQI = Pittsburgh Sleep Quality Index; SE = Standard Error; CI = Confidence Interval; Sep/Div/Wid = Separated / Divorced / Widowed; HS = High School; Estimates represent adjusted mean differences in outcome between groups for categorical covariates and adjusted slopes for categorical covariates; Root Mean Square Error (RMSE) = 3.96, ES = Effect Size (Estimate difference/RMSE) with ES  $\geq$  0.6 shaded in grey.

**Supplemental Table 6: PART-O Summary Adjusted Model Results**

| <b>PART-O Summary (Participation)</b>        |                 |           |                |                |           |
|----------------------------------------------|-----------------|-----------|----------------|----------------|-----------|
| <b>Covariates</b>                            | <b>Estimate</b> | <b>SE</b> | <b>95% CI</b>  | <b>p-value</b> | <b>ES</b> |
| <b>Chronic Pain Group</b>                    |                 |           |                |                |           |
| Current vs Past Pain                         | -0.05           | 0.03      | (-0.11, 0.00)  | 0.047          | 0.10      |
| Current vs No Pain                           | -0.03           | 0.02      | (-0.07, 0.01)  | 0.165          | 0.06      |
| Past vs No Pain                              | 0.03            | 0.03      | (-0.03, 0.08)  | 0.327          | 0.06      |
| <b>Follow-Up Period</b>                      |                 |           |                |                |           |
| Year 1 vs Year 2                             | -0.03           | 0.03      | (-0.09, 0.04)  | 0.410          | 0.06      |
| Year 1 vs Year 5                             | -0.04           | 0.03      | (-0.09, 0.02)  | 0.191          | 0.08      |
| Year 1 vs Year 10                            | 0.02            | 0.03      | (-0.04, 0.07)  | 0.560          | 0.04      |
| Year 1 vs Year 15+                           | 0.10            | 0.03      | (0.04, 0.15)   | <0.001         | 0.19      |
| Year 2 vs Year 5                             | -0.01           | 0.03      | (-0.07, 0.05)  | 0.740          | 0.02      |
| Year 2 vs Year 10                            | 0.04            | 0.03      | (-0.02, 0.11)  | 0.174          | 0.08      |
| Year 2 vs Year 15+                           | 0.12            | 0.03      | (0.06, 0.18)   | <0.001         | 0.23      |
| Year 5 vs Year 10                            | 0.05            | 0.03      | (0.00, 0.11)   | 0.052          | 0.10      |
| Year 5 vs Year 15+                           | 0.13            | 0.03      | (0.08, 0.18)   | <0.001         | 0.25      |
| Year 10 vs Year 15+                          | 0.08            | 0.03      | (0.03, 0.13)   | 0.002          | 0.15      |
| <b>Age (Years)</b>                           | -0.01           | 0.01      | (-0.02, -0.01) | <0.001         | 0.02      |
| <b>Sex (Male vs Female)</b>                  | 0.01            | 0.02      | (-0.03, 0.05)  | 0.584          | 0.02      |
| <b>White Race (Yes vs No)</b>                | 0.08            | 0.04      | (0.01, 0.15)   | 0.024          | 0.15      |
| <b>Black Race (Yes vs No)</b>                | -0.02           | 0.04      | (-0.09, 0.06)  | 0.662          | 0.04      |
| <b>Other Race (Yes vs No)</b>                | -0.02           | 0.04      | (-0.09, 0.06)  | 0.652          | 0.04      |
| <b>Ethnicity (Yes vs No)</b>                 | -0.01           | 0.03      | (-0.06, 0.06)  | 0.945          | 0.02      |
| <b>Marital Status</b>                        |                 |           |                |                |           |
| Single/Other vs Married                      | -0.58           | 0.02      | (-0.63, -0.54) | <0.001         | 1.11      |
| Single/Other vs Sep/Div/Wid                  | -0.08           | 0.03      | (-0.13, -0.03) | 0.002          | 0.15      |
| Married vs Sep/Div/Wid                       | 0.50            | 0.02      | (0.46, 0.55)   | <0.001         | 0.96      |
| <b>Level of Education</b>                    |                 |           |                |                |           |
| Less than HS vs HS/Other                     | -0.14           | 0.03      | (-0.20, -0.09) | <0.001         | 0.27      |
| Less than HS vs Some College/Associate       | -0.27           | 0.03      | (-0.33, -0.22) | <0.001         | 0.52      |
| Less than HS vs Bachelor or Higher           | -0.41           | 0.03      | (-0.46, -0.35) | <0.001         | 0.78      |
| HS/Other vs Some College/Associate           | -0.13           | 0.02      | (-0.18, -0.08) | <0.001         | 0.25      |
| HS/Other vs Bachelor or Higher               | -0.26           | 0.03      | (-0.31, -0.21) | <0.001         | 0.50      |
| Some College/Associate vs Bachelor or Higher | -0.13           | 0.02      | (-0.18, -0.09) | <0.001         | 0.25      |

| <b>Cause of Injury</b>    |       |       |               |        |      |
|---------------------------|-------|-------|---------------|--------|------|
| Vehicular vs Fall         | 0.03  | 0.02  | (-0.02, 0.07) | 0.284  | 0.06 |
| Vehicular vs Violence     | 0.06  | 0.03  | (0.00, 0.11)  | 0.048  | 0.11 |
| Vehicular vs Sports/Other | 0.01  | 0.03  | (-0.05, 0.06) | 0.763  | 0.02 |
| Fall vs Violence          | 0.03  | 0.03  | (-0.03, 0.10) | 0.346  | 0.06 |
| Fall vs Sports/Other      | -0.02 | 0.03  | (-0.08, 0.05) | 0.602  | 0.04 |
| Violence vs Sports/Other  | -0.05 | 0.04  | (-0.12, 0.02) | 0.188  | 0.10 |
| <b>FIM Motor</b>          | 0.02  | 0.001 | (0.01, 0.02)  | <0.001 | 0.04 |
| <b>FIM Cognition</b>      | 0.04  | 0.002 | (0.03, 0.05)  | <0.001 | 0.08 |

PART-O = Participation Assessment with Recombined Tools – Objective; SE = Standard Error; CI = Confidence Interval; Sep/Div/Wid = Separated / Divorced / Widowed; HS = High School; Estimates represent adjusted mean differences in outcome between groups for categorical covariates and adjusted slopes for categorical covariates; Root Mean Square Error (RMSE) = 0.52, ES = Effect Size (Estimate difference/RMSE) with ES  $\geq$  0.6 shaded in grey.

**Supplemental Table 7: PART-O Out and About Adjusted Model Results**

| <b>PART-O Out and About (Participation)</b>  |                 |           |                |                |           |
|----------------------------------------------|-----------------|-----------|----------------|----------------|-----------|
| <b>Covariates</b>                            | <b>Estimate</b> | <b>SE</b> | <b>95% CI</b>  | <b>p-value</b> | <b>ES</b> |
| <b>Chronic Pain Group</b>                    |                 |           |                |                |           |
| Current vs Past Pain                         | -0.11           | 0.03      | (-0.17, -0.05) | <0.001         | 0.18      |
| Current vs No Pain                           | -0.10           | 0.02      | (-0.15, -0.06) | <0.001         | 0.16      |
| Past vs No Pain                              | 0.01            | 0.03      | (-0.05, 0.07)  | 0.766          | 0.02      |
| <b>Follow-Up Period</b>                      |                 |           |                |                |           |
| Year 1 vs Year 2                             | -0.03           | 0.04      | (-0.10, 0.05)  | 0.513          | 0.05      |
| Year 1 vs Year 5                             | 0.01            | 0.03      | (-0.05, 0.08)  | 0.701          | 0.02      |
| Year 1 vs Year 10                            | -0.03           | 0.04      | (-0.10, 0.04)  | 0.468          | 0.05      |
| Year 1 vs Year 15+                           | -0.02           | 0.03      | (-0.09, 0.04)  | 0.466          | 0.03      |
| Year 2 vs Year 5                             | 0.04            | 0.04      | (-0.03, 0.11)  | 0.305          | 0.06      |
| Year 2 vs Year 10                            | 0.001           | 0.04      | (-0.08, 0.07)  | 0.986          | 0.002     |
| Year 2 vs Year 15+                           | 0.001           | 0.04      | (-0.07, 0.07)  | 0.991          | 0.002     |
| Year 5 vs Year 10                            | -0.04           | 0.03      | (-0.10, 0.03)  | 0.243          | 0.06      |
| Year 5 vs Year 15+                           | -0.04           | 0.03      | (-0.10, 0.02)  | 0.223          | 0.06      |
| Year 10 vs Year 15+                          | 0.001           | 0.03      | (-0.06, 0.06)  | 0.972          | 0.002     |
| <b>Age (Years)</b>                           | -0.01           | 0.001     | (-0.003, 0.01) | 0.371          | 0.02      |
| <b>Sex (Male vs Female)</b>                  | 0.13            | 0.02      | (0.08, 0.17)   | <0.001         | 0.21      |
| <b>White Race (Yes vs No)</b>                | 0.08            | 0.04      | (-0.003, 0.17) | 0.061          | 0.13      |
| <b>Black Race (Yes vs No)</b>                | 0.14            | 0.05      | (-0.08, 0.11)  | 0.767          | 0.22      |
| <b>Other Race (Yes vs No)</b>                | -0.06           | 0.05      | (-0.15, 0.03)  | 0.169          | 0.10      |
| <b>Ethnicity (Yes vs No)</b>                 | 0.02            | 0.04      | (-0.05, 0.09)  | 0.646          | 0.03      |
| <b>Marital Status</b>                        |                 |           |                |                |           |
| Single/Other vs Married                      | -0.12           | 0.03      | (-0.18, -0.07) | <0.001         | 0.19      |
| Single/Other vs Sep/Div/Wid                  | 0.02            | 0.03      | (-0.04, 0.08)  | 0.599          | 0.03      |
| Married vs Sep/Div/Wid                       | 0.14            | 0.03      | (0.09, 0.19)   | <0.001         | 0.22      |
| <b>Level of Education</b>                    |                 |           |                |                |           |
| Less than HS vs HS/Other                     | -0.06           | 0.04      | (-0.13, 0.01)  | 0.082          | 0.10      |
| Less than HS vs Some College/Associate       | -0.20           | 0.03      | (-0.27, -0.13) | <0.001         | 0.32      |
| Less than HS vs Bachelor or Higher           | -0.27           | 0.04      | (-0.34, -0.20) | <0.001         | 0.43      |
| HS/Other vs Some College/Associate           | -0.14           | 0.03      | (-0.19, -0.08) | <0.001         | 0.22      |
| HS/Other vs Bachelor or Higher               | -0.21           | 0.03      | (-0.27, -0.15) | <0.001         | 0.33      |
| Some College/Associate vs Bachelor or Higher | -0.07           | 0.03      | (-0.13, -0.02) | 0.008          | 0.11      |

| <b>Employment Status</b>       |       |       |                |        |       |
|--------------------------------|-------|-------|----------------|--------|-------|
| Employed/Student vs Retired    | 0.20  | 0.03  | (0.15, 0.26)   | <0.001 | 0.32  |
| Employed/Student vs Unemployed | 0.20  | 0.03  | (0.13, 0.27)   | <0.001 | 0.32  |
| Employed/Student vs Other      | 0.11  | 0.05  | (0.02, 0.21)   | 0.021  | 0.18  |
| Retired vs Unemployed          | 0.003 | 0.04  | (-0.07, 0.07)  | 0.935  | 0.005 |
| Retired vs Other               | -0.09 | 0.05  | (-0.19, 0.01)  | 0.080  | 0.14  |
| Unemployed vs Other            | -0.09 | 0.06  | (-0.20, 0.02)  | 0.117  | 0.14  |
| <b>Cause of Injury</b>         |       |       |                |        |       |
| Vehicular vs Fall              | 0.07  | 0.03  | (0.02, 0.13)   | 0.012  | 0.11  |
| Vehicular vs Violence          | 0.04  | 0.03  | (-0.03, 0.11)  | 0.238  | 0.06  |
| Vehicular vs Sports/Other      | -0.01 | 0.03  | (-0.08, 0.05)  | 0.682  | 0.02  |
| Fall vs Violence               | -0.03 | 0.04  | (-0.11, 0.05)  | 0.446  | 0.05  |
| Fall vs Sports/Other           | -0.08 | 0.04  | (-0.16, -0.01) | 0.028  | 0.13  |
| Violence vs Sports/Other       | -0.05 | 0.04  | (-0.14, 0.03)  | 0.213  | 0.08  |
| <b>FIM Motor</b>               | 0.02  | 0.001 | (0.01, 0.02)   | <0.001 | 0.03  |
| <b>FIM Cognition</b>           | 0.02  | 0.004 | (0.01, 0.02)   | <0.001 | 0.03  |

PART-O = Participation Assessment with Recombined Tools – Objective; SE = Standard Error; CI = Confidence Interval; Sep/Div/Wid = Separated / Divorced / Widowed; HS = High School; Estimates represent adjusted mean differences in outcome between groups for categorical covariates and adjusted slopes for categorical covariates; Root Mean Square Error (RMSE) = 0.63, ES = Effect Size (Estimate difference/RMSE) with ES  $\geq$  0.6 shaded in grey.

**Supplemental Table 8: PART-O Productivity Adjusted Model Results**

| <b>PART-O Productivity (Participation)</b>   |                 |           |                |                |           |
|----------------------------------------------|-----------------|-----------|----------------|----------------|-----------|
| <b>Covariates</b>                            | <b>Estimate</b> | <b>SE</b> | <b>95% CI</b>  | <b>p-value</b> | <b>ES</b> |
| <b>Chronic Pain Group</b>                    |                 |           |                |                |           |
| Current vs Past Pain                         | -0.01           | 0.04      | (-0.10, 0.07)  | 0.730          | 0.01      |
| Current vs No Pain                           | 0.03            | 0.03      | (-0.03, 0.09)  | 0.267          | 0.04      |
| Past vs No Pain                              | 0.05            | 0.04      | (-0.03, 0.13)  | 0.253          | 0.06      |
| <b>Follow-Up Period</b>                      |                 |           |                |                |           |
| Year 1 vs Year 2                             | -0.08           | 0.05      | (-0.18, 0.02)  | 0.104          | 0.10      |
| Year 1 vs Year 5                             | -0.15           | 0.04      | (-0.24, -0.07) | <0.001         | 0.19      |
| Year 1 vs Year 10                            | -0.03           | 0.05      | (-0.12, 0.06)  | 0.534          | 0.04      |
| Year 1 vs Year 15+                           | 0.09            | 0.04      | (0.01, 0.17)   | 0.035          | 0.11      |
| Year 2 vs Year 5                             | -0.07           | 0.05      | (-0.17, 0.02)  | 0.115          | 0.09      |
| Year 2 vs Year 10                            | 0.05            | 0.05      | (-0.04, 0.15)  | 0.293          | 0.06      |
| Year 2 vs Year 15+                           | 0.17            | 0.05      | (0.08, 0.26)   | <0.001         | 0.21      |
| Year 5 vs Year 10                            | 0.13            | 0.04      | (0.04, 0.21)   | 0.003          | 0.16      |
| Year 5 vs Year 15+                           | 0.25            | 0.04      | (0.17, 0.32)   | <0.001         | 0.31      |
| Year 10 vs Year 15+                          | 0.12            | 0.04      | (0.04, 0.20)   | 0.003          | 0.15      |
| <b>Age (Years)</b>                           | -0.02           | 0.001     | (-0.03, -0.02) | <0.001         | 0.02      |
| <b>Sex (Male vs Female)</b>                  | -0.02           | 0.03      | (-0.08, 0.04)  | 0.550          | 0.02      |
| <b>White Race (Yes vs No)</b>                | 0.05            | 0.06      | (-0.06, 0.16)  | 0.388          | 0.06      |
| <b>Black Race (Yes vs No)</b>                | -0.11           | 0.06      | (-0.22, 0.01)  | 0.074          | 0.14      |
| <b>Other Race (Yes vs No)</b>                | 0.05            | 0.06      | (-0.07, 0.16)  | 0.418          | 0.06      |
| <b>Ethnicity (Yes vs No)</b>                 | 0.05            | 0.05      | (-0.04, 0.14)  | 0.266          | 0.06      |
| <b>Marital Status</b>                        |                 |           |                |                |           |
| Single/Other vs Married                      | -0.48           | 0.04      | (-0.55, -0.41) | <0.001         | 0.59      |
| Single/Other vs Sep/Div/Wid                  | -0.23           | 0.04      | (-0.30, -0.15) | <0.001         | 0.28      |
| Married vs Sep/Div/Wid                       | 0.25            | 0.04      | (0.18, 0.32)   | <0.001         | 0.31      |
| <b>Level of Education</b>                    |                 |           |                |                |           |
| Less than HS vs HS/Other                     | -0.21           | 0.05      | (-0.30, -0.12) | <0.001         | 0.26      |
| Less than HS vs Some College/Associate       | -0.35           | 0.04      | (-0.43, -0.26) | <0.001         | 0.43      |
| Less than HS vs Bachelor or Higher           | -0.52           | 0.05      | (-0.62, -0.43) | <0.001         | 0.64      |
| HS/Other vs Some College/Associate           | -0.14           | 0.04      | (-0.21, -0.07) | <0.001         | 0.17      |
| HS/Other vs Bachelor or Higher               | -0.32           | 0.04      | (-0.39, -0.24) | <0.001         | 0.40      |
| Some College/Associate vs Bachelor or Higher | -0.18           | 0.03      | (-0.25, -0.11) | <0.001         | 0.22      |

| <b>Cause of Injury</b>    |       |       |               |        |      |
|---------------------------|-------|-------|---------------|--------|------|
| Vehicular vs Fall         | -0.01 | 0.04  | (-0.08, 0.06) | 0.836  | 0.01 |
| Vehicular vs Violence     | 0.01  | 0.04  | (-0.08, 0.09) | 0.859  | 0.01 |
| Vehicular vs Sports/Other | 0.03  | 0.04  | (-0.05, 0.12) | 0.470  | 0.04 |
| Fall vs Violence          | 0.02  | 0.05  | (-0.08, 0.12) | 0.763  | 0.02 |
| Fall vs Sports/Other      | 0.04  | 0.05  | (-0.06, 0.14) | 0.430  | 0.05 |
| Violence vs Sports/Other  | 0.02  | 0.06  | (-0.09, 0.13) | 0.672  | 0.02 |
| <b>FIM Motor</b>          | 0.03  | 0.002 | (0.02, 0.03)  | <0.001 | 0.04 |
| <b>FIM Cognition</b>      | 0.06  | 0.01  | (0.05, 0.07)  | <0.001 | 0.07 |

PART-O = Participation Assessment with Recombined Tools – Objective; SE = Standard Error; CI = Confidence Interval; Sep/Div/Wid = Separated / Divorced / Widowed; HS = High School; Estimates represent adjusted mean differences in outcome between groups for categorical covariates and adjusted slopes for categorical covariates; Root Mean Square Error (RMSE) = 0.81, ES = Effect Size (Estimate difference/RMSE) with ES  $\geq$  0.6 shaded in grey.



**Supplemental Table 9: PART-O Social Adjusted Model Results**

| <b>PART-O Social (Participation)</b>         |                 |           |                |                |           |
|----------------------------------------------|-----------------|-----------|----------------|----------------|-----------|
| <b>Covariates</b>                            | <b>Estimate</b> | <b>SE</b> | <b>95% CI</b>  | <b>p-value</b> | <b>ES</b> |
| <b>Chronic Pain Group</b>                    |                 |           |                |                |           |
| Current vs Past Pain                         | -0.02           | 0.04      | (-0.10, 0.06)  | 0.629          | 0.02      |
| Current vs No Pain                           | -0.01           | 0.03      | (-0.06, 0.05)  | 0.867          | 0.01      |
| Past vs No Pain                              | 0.02            | 0.04      | (-0.07, 0.10)  | 0.717          | 0.02      |
| <b>Follow-Up Period</b>                      |                 |           |                |                |           |
| Year 1 vs Year 2                             | 0.04            | 0.05      | (-0.06, 0.14)  | 0.393          | 0.05      |
| Year 1 vs Year 5                             | 0.04            | 0.04      | (-0.05, 0.13)  | 0.361          | 0.05      |
| Year 1 vs Year 10                            | 0.09            | 0.05      | (0.00, 0.18)   | 0.060          | 0.11      |
| Year 1 vs Year 15+                           | 0.18            | 0.04      | (0.09, 0.27)   | <0.001         | 0.22      |
| Year 2 vs Year 5                             | 0.003           | 0.05      | (-0.10, 0.09)  | 0.957          | 0.004     |
| Year 2 vs Year 10                            | 0.04            | 0.05      | (-0.05, 0.14)  | 0.378          | 0.05      |
| Year 2 vs Year 15+                           | 0.14            | 0.05      | (0.04, 0.23)   | 0.005          | 0.17      |
| Year 5 vs Year 10                            | 0.05            | 0.04      | (-0.04, 0.13)  | 0.278          | 0.06      |
| Year 5 vs Year 15+                           | 0.14            | 0.04      | (0.06, 0.22)   | <0.001         | 0.17      |
| Year 10 vs Year 15+                          | 0.09            | 0.04      | (0.01, 0.17)   | 0.023          | 0.11      |
| <b>Age (Years)</b>                           | -0.01           | 0.001     | (-0.01, -0.01) | <0.001         | 0.01      |
| <b>Sex (Male vs Female)</b>                  | -0.10           | 0.03      | (-0.16, -0.04) | 0.002          | 0.12      |
| <b>White Race (Yes vs No)</b>                | 0.12            | 0.06      | (-0.01, -0.23) | 0.038          | 0.15      |
| <b>Black Race (Yes vs No)</b>                | 0.08            | 0.06      | (-0.04, 0.19)  | 0.213          | 0.10      |
| <b>Other Race (Yes vs No)</b>                | -0.05           | 0.06      | (-0.17, 0.07)  | 0.378          | 0.06      |
| <b>Ethnicity (Yes vs No)</b>                 | -0.08           | 0.05      | (-0.18, 0.01)  | 0.076          | 0.10      |
| <b>Marital Status</b>                        |                 |           |                |                |           |
| Single/Other vs Married                      | -1.08           | 0.04      | (-1.15, -1.01) | <0.001         | 1.32      |
| Single/Other vs Sep/Div/Wid                  | -0.003          | 0.04      | (-0.08, 0.07)  | 0.945          | 0.004     |
| Married vs Sep/Div/Wid                       | 1.08            | 0.04      | (1.01, 1.15)   | <0.001         | 1.32      |
| <b>Level of Education</b>                    |                 |           |                |                |           |
| Less than HS vs HS/Other                     | -0.10           | 0.05      | (-0.19, -0.01) | 0.035          | 0.12      |
| Less than HS vs Some College/Associate       | -0.19           | 0.04      | (-0.28, -0.10) | <0.001         | 0.23      |
| Less than HS vs Bachelor or Higher           | -0.29           | 0.05      | (-0.39, -0.20) | <0.001         | 0.35      |
| HS/Other vs Some College/Associate           | -0.09           | 0.04      | (-0.16, -0.02) | 0.013          | 0.11      |
| HS/Other vs Bachelor or Higher               | -0.19           | 0.04      | (-0.27, -0.12) | <0.001         | 0.23      |
| Some College/Associate vs Bachelor or Higher | -0.10           | 0.04      | (-0.17, -0.03) | 0.004          | 0.12      |

| <b>Employment Status</b>       |        |       |                |        |       |
|--------------------------------|--------|-------|----------------|--------|-------|
| Employed/Student vs Retired    | 0.29   | 0.04  | (0.21, 0.36)   | <0.001 | 0.35  |
| Employed/Student vs Unemployed | 0.14   | 0.05  | (0.05, 0.23)   | 0.002  | 0.17  |
| Employed/Student vs Other      | 0.10   | 0.06  | (-0.02, 0.23)  | 0.106  | 0.12  |
| Retired vs Unemployed          | -0.14  | 0.05  | (-0.24, -0.05) | 0.003  | 0.17  |
| Retired vs Other               | -0.18  | 0.07  | (-0.31, -0.05) | 0.006  | 0.22  |
| Unemployed vs Other            | -0.04  | 0.07  | (-0.18, 0.10)  | 0.591  | 0.05  |
| <b>Cause of Injury</b>         |        |       |                |        |       |
| Vehicular vs Fall              | 0.01   | 0.04  | (-0.06, 0.08)  | 0.738  | 0.01  |
| Vehicular vs Violence          | 0.11   | 0.04  | (0.02, 0.19)   | 0.016  | 0.13  |
| Vehicular vs Sports/Other      | 0.01   | 0.04  | (-0.08, 0.10)  | 0.799  | 0.01  |
| Fall vs Violence               | 0.09   | 0.05  | (-0.01, 0.20)  | 0.065  | 0.11  |
| Fall vs Sports/Other           | -0.001 | 0.05  | (-0.10, 0.10)  | 0.983  | 0.001 |
| Violence vs Sports/Other       | -0.10  | 0.06  | (-0.21, 0.02)  | 0.090  | 0.12  |
| <b>FIM Motor</b>               | 0.004  | 0.002 | (0.001, 0.01)  | 0.028  | 0.01  |
| <b>FIM Cognition</b>           | 0.04   | 0.005 | (0.03, 0.05)   | <0.001 | 0.05  |

PART-O = Participation Assessment with Recombined Tools – Objective; SE = Standard Error; CI = Confidence Interval; Sep/Div/Wid = Separated / Divorced / Widowed; HS = High School; Estimates represent adjusted mean differences in outcome between groups for categorical covariates and adjusted slopes for categorical covariates; Root Mean Square Error (RMSE) = 0.82, ES = Effect Size (Estimate difference/RMSE) with ES  $\geq$  0.6 shaded in grey.
